# Supplementary material for: Wnt Modulation Enhances Otic Differentiation by Facilitating the Enucleation Process but Develops Unnecessary Cardiac Structures
Source: MDPI journal article supplement (doi:10.3390/ijms221910306), 2021-09-24
Supplement: s1 [file s1]

**Supplementary Table S1.** Statistical analysis of levels of mRNA expression for HC differentiation-related genes using RT-qPCR.

| Samples                  | (P Value)                     | Target Genes |       |         |      |      |       |     |  |
|--------------------------|-------------------------------|--------------|-------|---------|------|------|-------|-----|--|
|                          |                               | SOX2         | E-Cad | Laminin | PAX2 | PAX8 | ATOH1 | M7A |  |
| CHIR vs. (–) Control     | P > 0.05 (ns) P < 0.001 (***) | ***          | ns    | ***     | ***  | ***  | ***   | *** |  |
| CHIR vs. (+) Control 7D  | P > 0.05 (ns) P < 0.001 (***) | ***          | ns    | ***     | ***  | ***  | ***   | *** |  |
| CHIR vs. (+) Control 14D | P > 0.05 (ns) P < 0.001 (***) | ns           | ns    | ns      | ns   | ns   | ns    | *** |  |
